# Supplementary material
Source: HighWire-hosted journal article supplement (https://bmjopensem.bmj.com/content/4/1/e000289)
Supplement: inline-supplementary-material-1 [file inline-supplementary-material-1.docx]

**Supplement File 1:** Modifications done during cross-cultural adaptation and the reformation of the Australian version of the JECS questionnaire (JECS-Aus) to the Sri Lankan context

| **Main section of the questionnaire** | **Original questions in JECS-Aus** | **Modification done and reasoning** | **New questions/responses added to JECS-SL** |
| --- | --- | --- | --- |
| General details | - | No changes | - |
| Participation in cricket | - Please fill out the table below about how many matches and training sessions you did in the past week for Cricket - How many times in the past week did you practice/play cricket just for fun? | These two questions were removed (ask about competition and training workload) in order to keep with the objective of investigating injury risk perceptions in cricket | - |
| - Why do you play cricket?   - I want to play for Australia one day | The country ‘Australia’ was replaced with “Sri Lanka’ | I want to play cricket for Sri Lanka one day |
| Other sports you play | - Apart from Cricket, have you played any other sports over the past year? - What other sports have you played over the past year? - Will you play these sports again next year? - Which sport will you stop playing? - Why will you stop playing these sports next year? | The whole section (5 questions) was removed (ask about other sports participation) in order to keep with the objective of investigating injury risk perceptions in cricket | - |
| Sports injury history | - | No changes | - |
| Safety in cricket | - How much chance do you think a person has of getting hurt/injured doing the activities listed below?   - Australian rules football, Roller skating/blading, Basketball, Soccer, Playing on the trampoline, Skateboarding, Netball, Rugby, Cricket | 5 sports were removed (Australian rules football, Roller skating/blading, playing on the trampoline, Skateboarding, Netball) as they are not routinely played by the children in Sri Lanka. These were replaced by a local sport “elle” | Elle |
| - How much chance do you think a person playing in the positions below has of being injured? | For this question, there were 11 responses with different cricket playing scenarios.  Two of these responses were more general tasks (e.g. bowling, fielding in close to a batter). Therefore, these were replaced with more specific tasks to obtain 4 new cricket playing scenarios.  In addition, the response ‘wicket keeping’ was removed as there are four specific wicket keeping scenarios.  A new response was added in relation to batting (a batter running between wickets).  The new question had 13 responses | - A fast bowler or a medium pace bowler - A spin bowler - Fielding in the infield (at 30-yard circle) - Fielding in close to a batter (within 15 yards) - A batter running between wickets |
| - Please tick either ‘Yes’ or ‘No’ or ‘Don’t Know’ for each of the following questions   - If a famous player got hurt/injured while playing cricket (e.g. Ricky Ponting), would you feel safe playing cricket? | The name of the Australian cricketer “Ricky Ponting” was replaced by the Sri Lankan cricketer “Kumar Sangakkara” | If a famous player got hurt/injured while playing cricket (e.g. Kumar Sangakkara), would you feel safe playing cricket? |
| - How much chance do you think there is of getting injured in the following situations in cricket?   - Playing on grass  - Playing on hard ground  - Playing on bumpy ground | In addition to these three ground conditions mentioned, two more conditions (wet ground, raining) were added considering the tropical climate in Sri Lanka | - Playing on a wet ground  - Playing when it’s raining |
| - Are there any rules to do with safety that you have to follow when you play cricket with your club? - How much safer do you think these rules make you when you are playing cricket? (Please tick one box only) - Does your cricket competition have rules about the following? (More than one box can be ticked) | These three questions were removed (ask about safety rules) in order to keep with the objective of investigating injury safety and risk perception in cricket | - |
| - Do you think you will play cricket again next season? - How much do you agree or disagree with this statement? “It is important for me to play sports” | These two questions were removed as they are not directly liked with injury risk perceptions | - |
