# Supplementary material
Source: HighWire-hosted journal article supplement (https://bmjopensem.bmj.com/content/4/1/e000289)
Supplement: inline-supplementary-material-2 [file inline-supplementary-material-2.docx]

**Supplement File 2:** Percentage (%) agreement and Kappa values for JECS-SL Sinhala and Tamil versions of the injury risk perception questionnaire

| **Questions** | | **Variable**  **type** | **Sinhala Questionnaire** | | | | **Tamil Questionnaire** | | | |
| --- | --- | --- | --- | --- | --- | --- | --- | --- | --- | --- |
| **GENERAL DETAILS** | | **% Agreement** | **Kappa value** | **Ratinga** | **Action** | **% Agreement** | **Kappa value** | **Ratinga** | **Action** |
| **Date of birth: DD/MM/YYYY** | | **-** | 100% | NA | NA | Unchanged | 100% | NA | NA | Unchanged |
| **Are you a:**  □ Boy/Male □ Girl/Female | | Nominal | 100% | NA | NA | Unchanged | 100% | NA | NA | Unchanged |
| **District where you live:** | | Nominal | 100% | NA | NA | Unchanged | 100% | NA | NA | Unchanged |
| **Who do you usually live with?** (Please tick more than one box if appropriate) | | Nominal | b | | | | b | | | |
| - Mum & Dad | - Sisters/s → How many: |
| - Just Mum | - Brother/s → How many: |
| - Just Dad | - Guardian |
| - Grandparent/s | - Other. *Explain* |

| **PART A** | | | | | | | | | | | | | | | | | | | | | | | | | | | | | | | |
| --- | --- | --- | --- | --- | --- | --- | --- | --- | --- | --- | --- | --- | --- | --- | --- | --- | --- | --- | --- | --- | --- | --- | --- | --- | --- | --- | --- | --- | --- | --- | --- |
| **YOUR PARTICIPATION IN CRICKET** | | | | | | | | | | | | | | | | | | | **Variable**  **type** | | **Sinhala Questionnaire** | | | | | **Tamil Questionnaire** | | | | | |
| **% Agreement** | **Kappa value** | **Ratinga** | | **Action** | **%**  **Agreement** | **Kappa value** | **Ratinga** | **Action** | | |
| **1. How long have you been playing cricket?** (please tick one box only) | | | | | | | | | | | | | | | | | | | Nominal | | 100% | 1.00 | Almost perfect | | Unchanged | 96.7 | 0.94 | Almost perfect | Unchanged | | |
| - It’s my first season / year | | | | | | - 6 years | | | | | | | | | | | | |
| - 2 years | | | | | | - 7 years | | | | | | | | | | | | |
| - 3 years | | | | | | - 8 years | | | | | | | | | | | | |
| - 4 years | | | | | | - More than 8 years | | | | | | | | | | | | |
| - 5 years | | | | | |  | | | | | | | | | | | | |  |  |  | | |
| **2. How much do you like playing cricket?** (please tick one box only) | | | | | | | | | | | | | | | | | | | Nominal | | 95.7% | 0.65 | Substantial | | Unchanged | 93.3% | 0.48 | Moderate | Modified | | |
| - It’s great fun | | | | | - It’s a bit fun | | | | | | | | - I don’t know | | | | | |
| - It’s not very fun | | | | | - It’s not very fun at all | | | | | | | | | | | | | |
| **3. Why did you start playing cricket?** (Only tick the one box that suits you the most) | | | | | | | | | | | | | | | | | | | Nominal | | 100% | 1.00 | Almost perfect | | Unchanged | 96.7% | 0.84 | Almost perfect | Unchanged | | |
| - I wanted to play it | | | | | | | | | - My friends played it | | | | | | | | | |
| - My parents wanted me to play it | | | | | | | | | - Other reasons. *Explain* | | | | | | | | | |
| - My mum or dad played it | | | | | | | | |  | | | | | | | | | |
| - My brother or sister played it | | | | | | | | |  | | | | | | | | | |
| **4. Why do you play cricket?** (More than one box can be ticked) | | | | | | | | | | | | | | | | | | | Nominal | | b | | | | | b | | | | | |
| - I enjoy playing it | | | | | | | | | | | | - My friends play it | | | | | | |
| - I don’t like any other sports | | | | | | | | | | | | - I am good at it | | | | | | |
| - It’s the only sport my parents let me play | | | | | | | | | | | | - It’s a safe sport to play | | | | | | |
| - Where I play is close to home | | | | | | | | | | | | - I like being part of a team | | | | | | |
| - Playing it runs in my family | | | | | | | | | | | | - It’s cheap to play | | | | | | |
| - I got hurt playing another sport | | | | | | | | | | | | - I like watching it on TV | | | | | | |
| - I want to play for Sri Lanka one day | | | | | | | | | | | | - I like using the gear | | | | | | |
| - I like playing competitive games | | | | | | | | | | | | - I really like batting | | | | | | |
| - I really like wicket keeping | | | | | | | | | | | | - I really like bowling | | | | | | |
| - I really like fielding | | | | | | | | | | | | - Other reasons. Explain: | | | | | | |
|  | | | | | | | | |  | | | | | | | | | |  | |
|  | | | | | | | | | | | | | | | | | | | | | | | | | | | | | | |  |
| **PART B** | | | | | | | | | | | | | | | | | | | | | | | | | | | | | | | |
| **YOUR SPORT INJURY HISTORY** | | | | | | | | | | | | | | | | | | | **Variable**  **Type** | | **Sinhala Questionnaire** | | | | | **Tamil Questionnaire** | | | | | |
| **% Agreement** | **Kappa value** | | **Ratinga** | **Action** | **% Agreement** | **Kappa value** | **Ratinga** | | **Action** | |
| **5. Did you get sore, hurt or injured playing cricket last season?** (please tick) | | | | | | | | | | | | | | | | | | | Nominal | | 100% | 1.00 | | Almost perfect | Unchanged | 96.7 | 0.49 | Moderate | | Modified | |
| - YES → **Go to next Question** | | | | | | | - NO → **Go to Question 14** | | | | | | | | | | | |
|  | | | | | | |  | | | | | | | | | | | |
|  | | | | | | | - NO, I didn’t play the last season   → **Go to Question 14** | | | | | | | | | | | |
| **YOU MAY HAVE BEEN INJURED MORE THAN ONCE LAST SEASON, BUT FOR THE FOLLOWING QUESTIONS PLEASE THINK OF THE WORST INJURY YOU GOT.** | | | | | | | | | | | | | | | | | | |  | |  |  | |  |  |  |  |  | |  | |
| **6. What were you doing when you got injured playing cricket? (please tick)** | | | | | | | | | | | | | | | | | | | Nominal | | 100% | 1.00 | | Almost perfect | Unchanged | 100% | 1.00 | Almost perfect | | Unchanged | |
| - Fielding | | | | | - Catching the ball | | | | | | | | | | | | | |
| - Bowling | | | | | - Running for the ball | | | | | | | | | | | | | |
| - Batting | | | | | - Other. *Explain* | | | | | | | | | | | | | |
| - Wicket keeping | | | | |  | | | | | | | | | | | | | |
| - Throwing the ball | | | | |  | | | | | | | | | | | | | |
| **7. Where were you when you got injured?** (please tick) | | | | | | | | | | | | | | | | | | | Nominal | | 100% | 1.00 | | Almost perfect | Unchanged | 100% | 1.00 | Almost perfect | | Unchanged | |
| - Cricket team match (club, academy or school match) | | | | | | | | | | | - At school (recess/lunchtime) | | | | | | | |
| - Cricket team training (club, academy or school training) | | | | | | | | | | | - Backyard/nets/park | | | | | | | |
| - Other: |  | | | | | | | | | | | | | | | | | |
| **8. Did you have to stop playing at the time of the injury?** | | | | | | | | | | | | | | | | | | | Nominal | | 100% | c | | | | 93.8% | 0.82 | Almost perfect | | Unchanged | |
| - YES | | | | | - NO | | | | | | | | | | | | | |
| **9. Did you get medical treatment for the injury (e.g. Doctor, coach, physio)?** (please tick) | | | | | | | | | | | | | | | | | | | Nominal | | 100% | 1.00 | | Almost perfect | Unchanged | 93.8% | 0.89 | Almost perfect | | Unchanged | |
| - YES | | | - NO | | | | | | | - NOT SURE | | | | | | | | |
| **10. Did the injury(s) stop you from playing cricket for any amount of time? (e.g. for a few days or a few weeks**) (please tick) | | | | | | | | | | | | | | | | | | | Nominal | | 92.3% | 0.75 | | Substantial | Unchanged | 100% | 1.00 | Almost perfect | | Unchanged | |
| - YES | | | - NO | | | | | | | - NOT SURE | | | | | | | | |
| **11. Did the injury(s) stop you from going to school for any amount of time? (e.g. for a few days or a few weeks)** (please tick) | | | | | | | | | | | | | | | | | | | Nominal | | 100% | 1.00 | | Almost perfect | Unchanged | 87.5% | 0.61 | Substantial | | Unchanged | |
| - YES | - NO | | | | - NO –   because it happened  during school holidays | | | | | | | | | | - NOT SURE | | | |
| **12. Did getting injured make you think about not playing cricket anymore?** (please tick) | | | | | | | | | | | | | | | | | | | Nominal | | 100% | c | | | | 93.8% | c | | | | |
| - YES | | | - NO | | | | | | | - NOT SURE | | | | | | | | |
| **13. Did your parents want you to stop playing cricket because you got injured? (please tick)** | | | | | | | | | | | | | | | | | | | Nominal | | 100% | 1.00 | | Almost perfect | Unchanged | 87.5% | 0.45 | Moderate | | Modified | |
| - YES | | | - NO | | | | | | | - NOT SURE | | | | | | | | |
|  | | | | | | | | | | | | | | | | | | | | | | | | | | | | | | | |
| **PART C** | | | | | | | | | | | | | | | | | | | | | | | | | | | | | | | |
| **SAFETY IN CRICKET** | | | | | | | | | | | | | | | | | | | | **Variable**  **Type** | **Sinhala Questionnaire** | | | | | **Tamil Questionnaire** | | | | | |
| **% Agreement** | **Kappa* value** | | **Ratinga** | **Action** | **% Agreement** | **Kappa value** | **Ratinga** | | **Action** | |
| **14. Do you think you can get injured playing some sports** | | | | | | | | | | | | | | | | | | | | Nominal | 91.3% | 0.86 | | Almost perfect | Unchanged | 83.3% | 0.74 | Substantial | | Unchanged | |
| - YES | | | | - NO | | | | | | | | | | - NOT SURE | | | | | |
| **15. How much chance of getting injured do you think you have when playing cricket?** | | | | | | | | | | | | | | | | | | | | Ordinal | 79.2% | 0.45 | | Moderate | Modified | 86.7% | 0.77 | Substantial | | Unchanged | |
| - No chance | | - A small chance | | | | | | - A high Chance | | | | | | | | - Not sure | | | |
| **16. How much chance do you think a person has of getting hurt/injured doing the activities listed below?** (Please tick one box for each activity) | | | | | | | | | | | | | | | | | | | |  |  |  | |  |  |  |  |  | |  | |
|  | | | | | | | | | | | | **No chance** | | **A small chance** | | | **A high chance** | **Don’t know** | |
| Cycling | | | | | | | | | | | |  | |  | | |  |  | | Ordinal | 83.3% | 0.80 | | Substantial | Unchanged | 93.3% | 0.81 | Almost perfect | | Unchanged | |
| Basketball | | | | | | | | | | | |  | |  | | |  |  | | Ordinal | 87.5% | 0.84 | | Almost perfect | Unchanged | 86.7% | 0.73 | Substantial | | Unchanged | |
| Soccer | | | | | | | | | | | |  | |  | | |  |  | | Ordinal | 87.5% | 0.73 | | Substantial | Unchanged | 80% | 0.63 | Substantial | | Unchanged | |
| Elle | | | | | | | | | | | |  | |  | | |  |  | | Ordinal | 70.8% | 0.59 | | Moderate | Unchanged | 86.7% | 0.86 | Almost perfect | | Unchanged | |
| Rugby | | | | | | | | | | | |  | |  | | |  |  | | Ordinal | 95.8% | 0.78 | | Substantial | Unchanged | 90% | 0.86 | Almost perfect | | Unchanged | |
| Cricket | | | | | | | | | | | |  | |  | | |  |  | | Ordinal | 83.3% | 0.81 | | Almost perfect | Unchanged | 96.6% | 1.00 | Almost perfect | | Unchanged | |
| **17. How much chance do you think a person playing in the positions below has of being injured?** (Please tick one box for each position) | | | | | | | | | | | | | | | | | | | |  |  |  | |  |  |  |  |  | |  | |
| **Cricket Position** | | | | | | | | | | | | **No chance** | | **A small chance** | | | **A high chance** | **Don’t know** | |
| A fast bowler or medium pace bowler | | | | | | | | | | | |  | |  | | |  |  | | Ordinal | 75% | 0.60 | | Moderate | Modified | 93.3% | 0.82 | Almost perfect | | Unchanged | |
| A spin bowler | | | | | | | | | | | |  | |  | | |  |  | | Ordinal | 95.8% | 0.87 | | Almost perfect | Unchanged | 86.7% | 0.78 | Substantial | | Unchanged | |
| A wicket keeper wearing a helmet while wicket keeping facing a spin bowler | | | | | | | | | | | |  | |  | | |  |  | | Ordinal | 79.2% | 0.65 | | Substantial | Modified | 83.3% | 0.8 | Substantial | | Unchanged | |
| A wicket keeper is not wearing a helmet while wicket keeping facing a spin bowler | | | | | | | | | | | |  | |  | | |  |  | | Ordinal | 79.2% | 0.32 | | Fair | Modified | 80% | 0.7 | Substantial | | Unchanged | |
| A wicket keeper wearing a helmet while wicket keeping facing a fast bowler | | | | | | | | | | | |  | |  | | |  |  | | Ordinal | 91.7% | 0.48 | | Moderate | Modified | 90% | 0.9 | Almost perfect | | Unchanged | |
| A wicket keeper is not wearing a helmet while wicket keeping facing a fast bowler | | | | | | | | | | | |  | |  | | |  |  | | Ordinal | 79.2% | 0.64 | | Substantial | Modified | 76.7% | 0.65 | Substantial | | Unchanged | |
| A batter against a spin bowler | | | | | | | | | | | |  | |  | | |  |  | | Ordinal | 83.3% | 0.70 | | Substantial | Unchanged | 93.3% | 0.93 | Almost perfect | | Unchanged | |
| A batter against a fast bowler | | | | | | | | | | | |  | |  | | |  |  | | Ordinal | 87.5% | 0.76 | | Substantial | Unchanged | 86.2% | 0.83 | Almost perfect | | Unchanged | |
| A batter running between wickets | | | | | | | | | | | |  | |  | | |  |  | | Ordinal | 79.2% | 0.75 | | Substantial | Unchanged | 76.7% | 0.56 | Moderate | | Unchanged | |
| Fielding in the outfield (at boundary line) | | | | | | | | | | | |  | |  | | |  |  | | Ordinal | 83.3% | 0.59 | | Moderate | Modified | 72.4% | 0.60 | Moderate | | Modified | |
| Fielding in the infield (at 30 yards circle) | | | | | | | | | | | |  | |  | | |  |  | | Ordinal | 87.5% | 0.82 | | Almost perfect | Unchanged | 75.9% | 0.59 | Moderate | | Modified | |
| Fielding in close to a batter (within 15 yards) | | | | | | | | | | | |  | |  | | |  |  | | Ordinal | 83.3% | 0.39 | | Fair | Modified | 86.7% | 0.80 | Substantial | | Unchanged | |
| Fielding in slips | | | | | | | | | | | |  | |  | | |  |  | | Ordinal | 79.2% | 0.64 | | Substantial | Unchanged | 83.3% | 0.81 | Almost perfect | | Unchanged | |
| **18. Please tick either ‘Yes’ or ‘No’ or ‘Don’t Know’ for each of the following questions** | | | | | | | | | | | | | | | | | | | |  |  |  | |  |  |  |  |  | |  | |
|  | | | | | | | | | | | | | | **YES** | | | **NO** | **DON’T**  **KNOW** | |
| Has anyone told you playing cricket can be dangerous? | | | | | | | | | | | | | |  | | |  |  | | Nominal | 95.8% | 0.92 | | Almost perfect | Unchanged | 100% | 1.00 | Almost perfect | | Unchanged | |
| Do you remember ever feeling unsafe while actually playing cricket? | | | | | | | | | | | | | |  | | |  |  | | Nominal | 91.7% | 0.83 | | Almost perfect | Unchanged | 93.3% | 0.85 | Almost perfect | | Unchanged | |
| If one of your friends got hurt/injured while playing cricket, would you feel safe playing it? | | | | | | | | | | | | | |  | | |  |  | | Nominal | 91.7% | 0.85 | | Almost perfect | Unchanged | 90% | 0.84 | Almost perfect | | Unchanged | |
| If a famous player got hurt/injured while playing cricket (e.g. Kumar Sangakkara), would you feel safe playing cricket? | | | | | | | | | | | | | |  | | |  |  | | Nominal | 91.3% | 0.85 | | Almost perfect | Unchanged | 90% | 0.84 | Almost perfect | | Unchanged | |
| **19. How much chance do you think there is of getting injured in the following situations in cricket**? (Please tick one box for each situation) | | | | | | | | | | | | | | | | | | | |  |  |  | |  |  |  |  |  | |  | |
|  | | | | | | | | | | | | **No chance** | | **A small chance** | | | **A high chance** | **Don’t know** | |
| Playing on grass | | | | | | | | | | | |  | |  | | |  |  | | Ordinal | 91.7% | 0.62 | | Substantial | Unchanged | 90% | 0.79 | Substantial | | Unchanged | |
| Playing on hard ground (mainly dirt, not much grass) | | | | | | | | | | | |  | |  | | |  |  | | Ordinal | 83.3% | 0.45 | | Moderate | Modified | 90% | 0.81 | Almost perfect | | Unchanged | |
| Playing on bumpy ground | | | | | | | | | | | |  | |  | | |  |  | | Ordinal | 95.7% | d | | | Unchanged | 93.3% | 0.93 | Almost perfect | | Unchanged | |
| Playing on a wet ground | | | | | | | | | | | |  | |  | | |  |  | | Ordinal | 79.2% | 0.73 | | Substantial | Unchanged | 83.3% | 0.72 | Substantial | | Unchanged | |
| Playing when it’s raining | | | | | | | | | | | |  | |  | | |  |  | | Ordinal | 91.7% | 0.83 | | Almost perfect | Unchanged | 86.7% | 0.86 | Almost perfect | | Unchanged | |
| **20. Do you do anything special to help stay safe while playing cricket?** | | | | | | | | | | | | | | | | | | | |  | 100% | 1.00 | | Almost perfect | Unchanged | 93.3% | 0.84 | Almost perfect | | Unchanged | |
| - YES → **Go to Question 22** | | | | | | | | | | | | - NO → **Go to Question 23** | | | | | | | |
| **21. What things do you do to help stay safe while playing cricket?** (Please list) | | | | | | | | | | | | | | | | | | | |  | e | | | | Unchanged | e | | | | Unchanged | |
| 1……………………………………………………………………………………………………………….. | | | | | | | | | | | | | | | | | | | |
| 2……………………………………………………………………………………………………………….. | | | | | | | | | | | | | | | | | | | |
| 3……………………………………………………………………………………………………………….. | | | | | | | | | | | | | | | | | | | |
| **22. Put a tick in the boxes next to the two types of rules that you think are the most important for keeping you safe while playing cricket.** (Please tick only two boxes)  **RULES TO DO WITH** | | | | | | | | | | | | | | | | | | | |  | b | | | | Unchanged | b | | | | Unchanged | |
| - Wearing safety gear (e.g. helmet, leg pads) | | | | | | | | | | | | - Having a drinks break | | | | | | | |
| - The number of balls that can be bowled | | | | | | | | | | | | - Not arguing with the umpire | | | | | | | |
| - Stopping play if the day is too hot | | | | | | | | | | | | - Not being too close to the wicket when someone is bowling | | | | | | | |
| - Stopping play if the ground is too hard | | | | | | | | | | | | - Other. *Explain* | | | | | | | |
| - How long you can bat/field for | | | | | | | | | | | |  | | | | | | | |
| - Where you stand on the field | | | | | | | | | | | |  | | | | | | | |
| **23. Which one of the following statements do you agree with most?** (Please tick one box only) | | | | | | | | | | | | | | | | | | | | Nominal | 91.7% | 0.86 | | Almost perfect | Unchanged | 96.6% | 0.95 | Almost perfect | | Unchanged | |
| - I think there should be more rules to make playing cricket safer. | | | | | | | | | | | | | | | | | | | |
| - Cricket is already a safe sport and there is no need for any more rules to do with safety. | | | | | | | | | | | | | | | | | | | |
| - There are too many rules in junior cricket to do with safety. | | | | | | | | | | | | | | | | | | | |

aCategories used according to Landis and Koch (1977)

bMultiple response items were excluded from the analysis

c Kappa statistics could not be computed because test-1 and test-2 question responses are constants

dKappa statistics could not be computed because all ratings are the same for at least one rater.

eOpen answer items were excluded from the analysis

*Weighted Kappa values were calculated for ordinal variables
